# Supplementary material for: Synthesis and evaluation of thermally-responsive coatings based upon Diels–Alder chemistry and renewable materials
Source: Royal Society of Chemistry journal article supplement (doi:10.1039/c3py01024d), 2013-08-21
Supplement: c3py01024d.pdf [file c3py01024d.pdf]

## Supporting Information

# Synthesis and evaluation of thermally-responsive coatings based upon Diels-Alder chemistry and renewable materials

Dahlia N. Amato, Gregory A. Strange, John P. Swanson, Anton D. Chavez, Suzanne E. Roy, Kim L. Varney, Craig A. Machado, Douglas V. Amato and Philip J. Costanzo\*

*Department of Chemistry and Biochemistry, California Polytechnic State University, California, 93405-0402*

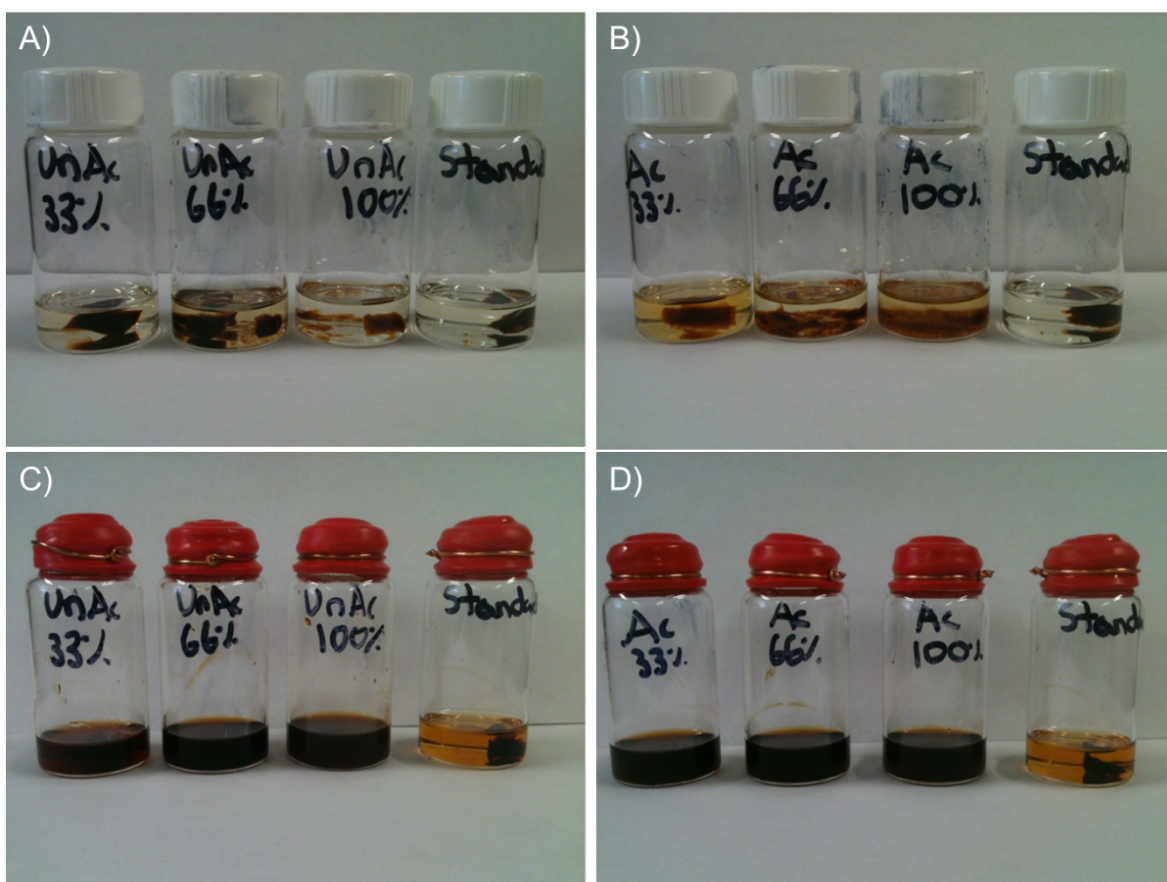

**Figure S1.** Pictographs of TR-SBO (Left - unacetylated; Right - acetylated) cured with IPDI in a one to one NCO:OH ratio in DMF before (Top) and after (Bottom) thermal treatment.

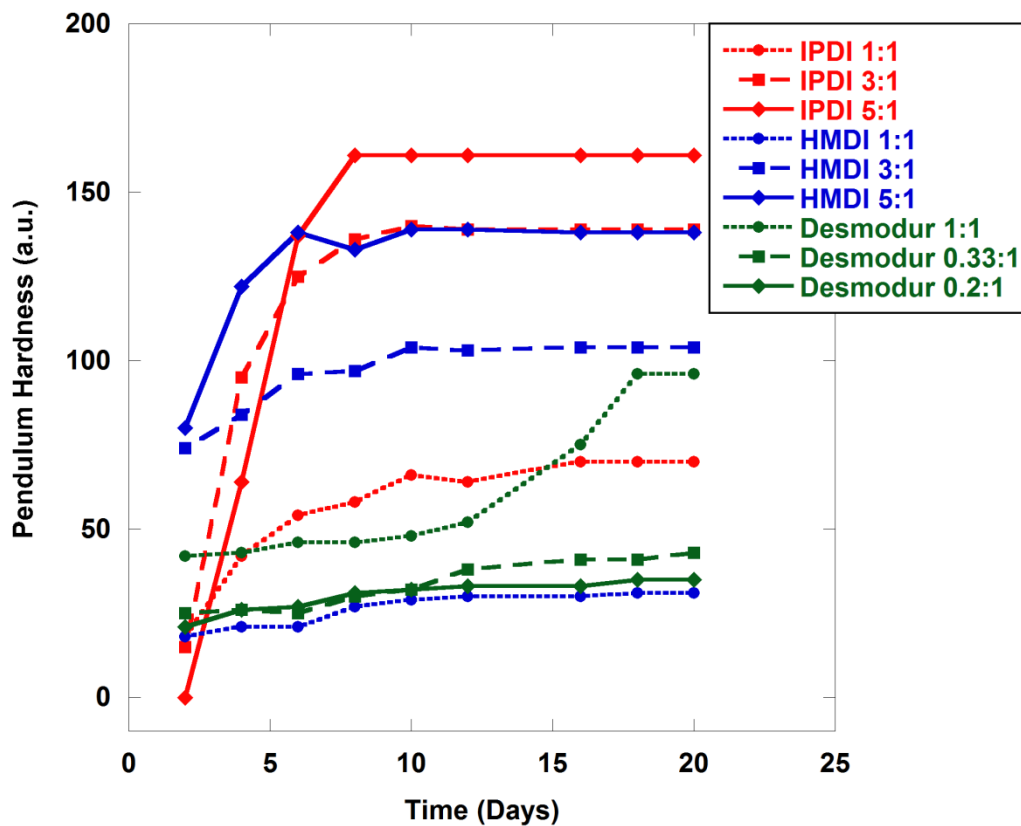

**Figure S2.** Hardness measurements of TR-SBO films (Sample 4) cured with various NCO:OH ratios and various curing agents.

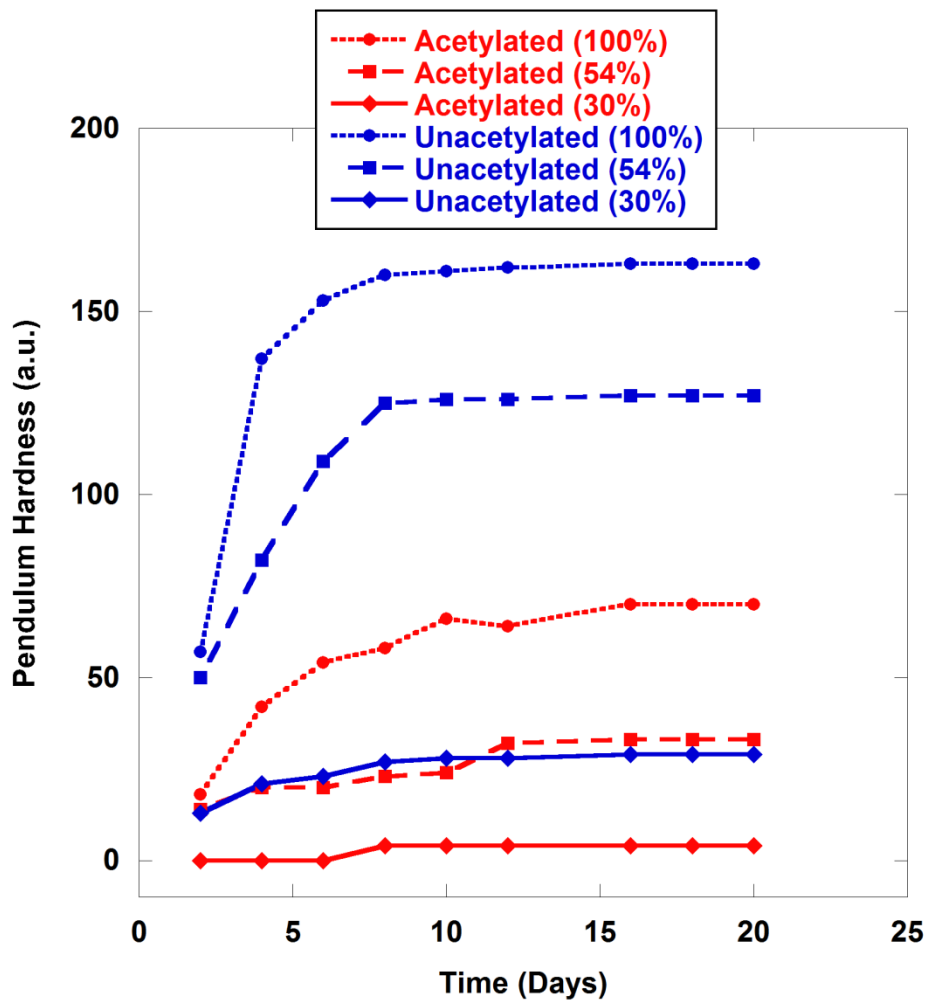

**Figure S3.** Hardness measurements of TR-SBO films (Unacetylated - Samples 1, 2 and 3; Acetylated - Samples 4, 5 and 6) cured with IPDI in a one to one NCO:OH ratio.

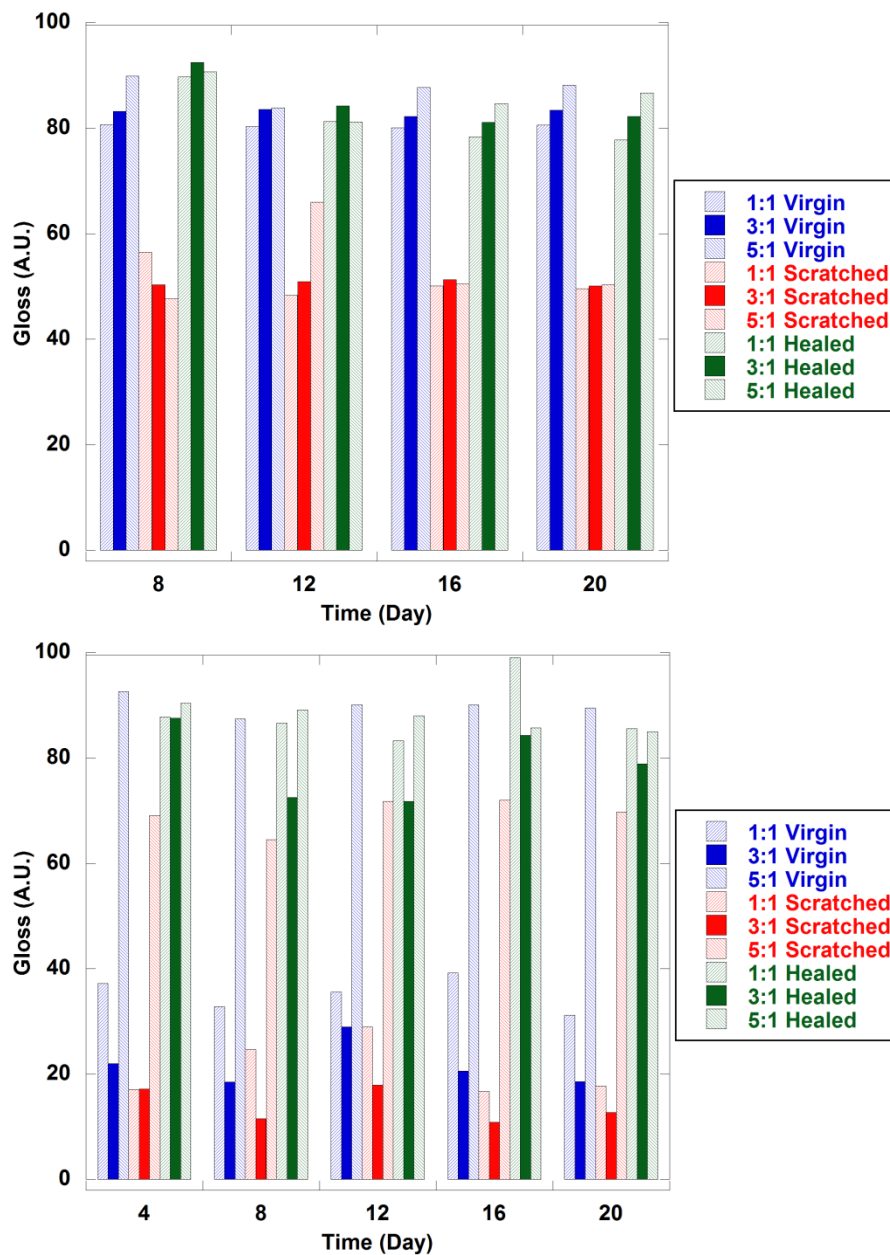

**Figure S4.** Gloss measurements of TR-SBO topcoat resins [Top - Sample 6 (30% Diels-Alder); Bottom - Sample 4 (100% Diels-Alder)] prepared with IPDI and various NCO:OH ratios after deformation and exposure to thermal treatment.

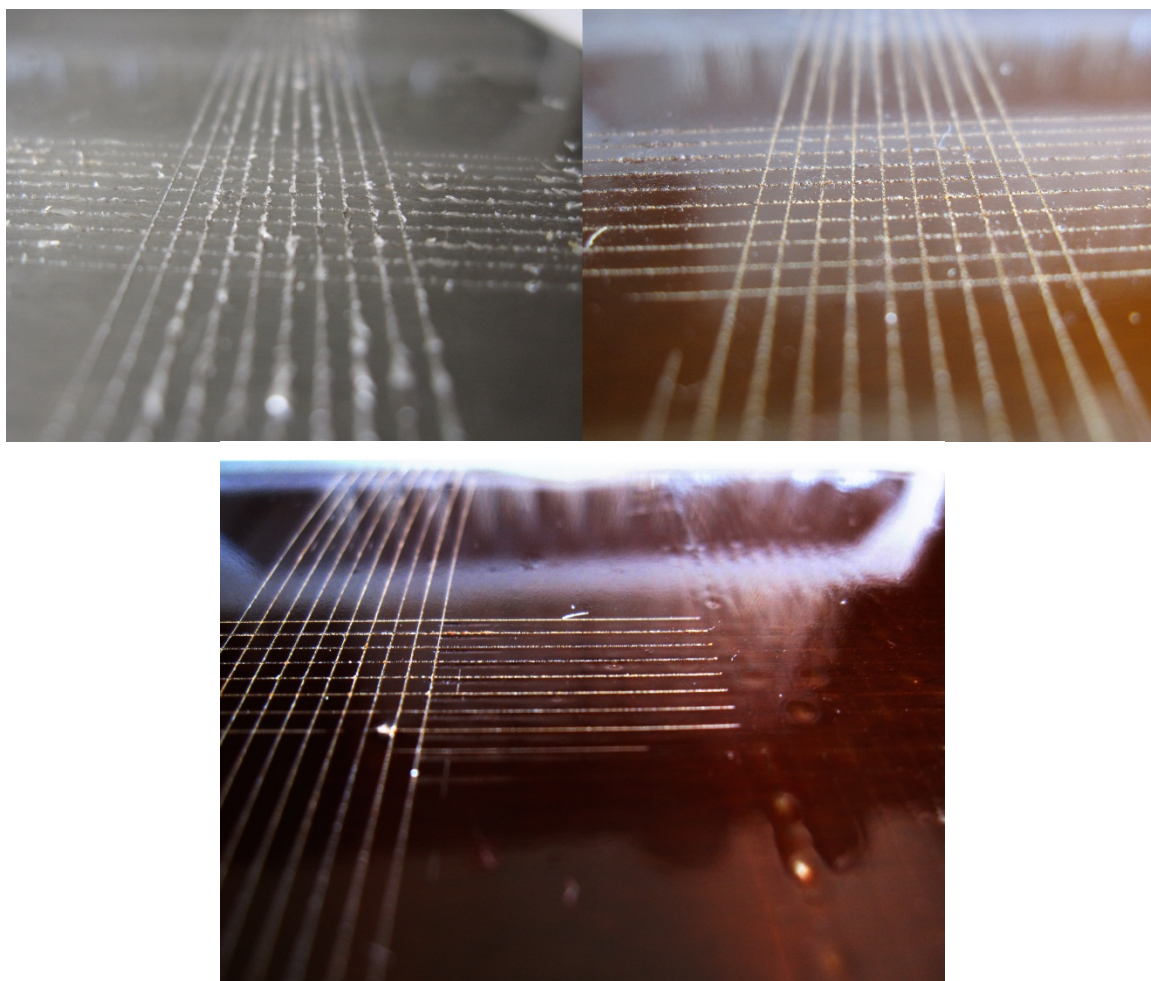

**Figure S5.** Pictographs of samples before and after thermal treatment following cross cut deformation. All samples cured with IPDI in a one to one NCO:OH ratio. Top left : control film (FSBO) before thermal treatment; Top right : Sample 4 (100% Diels-Alder) before thermal treatment; Bottom : Sample 4 (100% Diels-Alder) before and after thermal treatment.
